# Supplementary material for: Association Between Telemedicine Use in Nonmetropolitan Counties and Quality of Care Received by Medicare Beneficiaries With Serious Mental Illness
Source: PubMed Central journal article supplement (PMC9237790; doi:10.1001/jamanetworkopen.2022.18730), 2022-06-27
Supplement: jamanetwopen-e2218730-s001.pdf [file jamanetwopen-e2218730-s001.pdf]

## Supplementary Online Content

Wang B, Huskamp HA, Rose S, et al. Association between telemedicine use in nonmetropolitan counties and quality of care received by Medicare beneficiaries with serious mental illness. *JAMA Netw Open*. 2022;5(6):e2218730. doi:10.1001/jamanetworkopen.2022.18730

**eTable 1.** List of Antipsychotic/Antimanic Drugs

**eTable 2.** Supplemental Data Dictionary for Table 1

**eFigure.** Regression Model

**eTable 3.** List of HCPCS Codes for Defining Outpatient Visits

This supplementary material has been provided by the authors to give readers additional information about their work.

**eTable 1.** List of Antipsychotic/Antimanic Drugs

| <b>Generic Name</b> | <b>Type</b>   |
|---------------------|---------------|
| ARIPIRAZOLE         | antipsychotic |
| ASENAPINE           | antipsychotic |
| BREXPIRAZOLE        | antipsychotic |
| CARBAMAZEPINE       | amanic        |
| CARIPRAZINE         | antipsychotic |
| CHLORPROMAZINE      | antipsychotic |
| CHLORPROTHIXENE     | antipsychotic |
| CLOZAPINE           | antipsychotic |
| DIVALPROEX          | amanic        |
| FLUPHENAZINE        | antipsychotic |
| HALOPERIDOL         | antipsychotic |
| ILOPERIDONE         | antipsychotic |
| LAMOTRIGINE         | amanic        |
| LITHIUM             | amanic        |
| LOXAPINE            | antipsychotic |
| LURASIDONE          | antipsychotic |
| MESORIDAZINE        | antipsychotic |
| MOLINDONE           | antipsychotic |
| OLANZAPINE          | antipsychotic |
| OXCARBAZEPINE       | amanic        |
| PALIPERIDONE        | antipsychotic |
| PERPHENAZINE        | antipsychotic |
| PIMOZIDE            | antipsychotic |
| PIPERACETAZINE      | antipsychotic |
| PROMAZINE           | antipsychotic |
| QUETIAPINE          | antipsychotic |
| RISPERIDONE         | antipsychotic |
| THIORIDAZINE        | antipsychotic |
| THIOTHIXENE         | antipsychotic |
| TRIFLUOPERAZINE     | antipsychotic |
| TRIFLUPROMAZINE     | antipsychotic |
| VALPROIC            | amanic        |
| ZIPRASIDONE         | antipsychotic |

**eTable 2.** Supplemental Data Dictionary for Table 1

| <b>Variable</b>                                              | <b>Source</b> | <b>Year</b> | <b>Other Names</b> | <b>Definition</b>                                         |
|--------------------------------------------------------------|---------------|-------------|--------------------|-----------------------------------------------------------|
| Household Income (Median \$)                                 | AHRF          | 2019        | F1322608           | County median household income.                           |
| Population Density (Person/Square Mile)                      | AHRF          | 2019        | F1387600           | Number of people per square mile in county.               |
| Household with Broadband (%)                                 | Census        | 2010        |                    | Percentage of households with broadband access in county. |
| Hospital Beds per 1,000 people in county                     | AHRF          | 2019        | F0892107           | Number of hospital beds per capita in county.             |
| Community Health Centers per 1,000 people in county          | AHRF          | 2019        | F1322108           | Number of community centers per capita in county.         |
| Physicians/Advanced Practice Nurses per 100 people in county | AHRF          | 2019        | F1322108, F1212908 | Sum of total active MDs and total active APRNs in county. |

**eFigure.** Regression Model

$$Y_i = \text{County} + \text{Year} + \text{High}_i'b + \text{Moderate}_i'r + \text{Low}_i's$$

**eTable 3.** List of HCPCS codes for defining outpatient visits

|       |           |       |       |       |       |       |       |       |       |       |       |       |       |
|-------|-----------|-------|-------|-------|-------|-------|-------|-------|-------|-------|-------|-------|-------|
| H0001 | H0002     | H0004 | H0005 | H0006 | H0014 | H0015 | H0016 | H0020 | H0022 | H0023 | H0028 | H0030 | H0031 |
| H0033 | H0034     | H0036 | H0037 | H0038 | H0039 | H0040 | H0046 | H0049 | H0050 | H1011 | H2000 | H2001 | H2010 |
| H2013 | H2014     | H2015 | H2016 | H2017 | H2018 | H2019 | H2020 | H2021 | H2023 | H2024 | H2025 | H2026 | H2027 |
| H2028 | H2020     | H2030 | H2031 | H2032 | H2033 | H2037 | H5010 | H5020 | H5025 | H5030 | H5220 | H5230 | H5240 |
| H5299 | M006<br>4 | Q3014 | S0280 | S0281 | S3005 | S9110 | S9127 | S9454 | S9482 | T0006 | T0011 | T0012 | T0015 |
| T0016 | T1017     | T1018 | T1023 | T1024 | T1025 | T1026 | T1027 | T1040 | T1041 | T2010 | T2011 | T2012 | T2013 |
| T2014 | T2015     | T2018 | T2019 | T2020 | T2021 | T2022 | T2023 | T2036 | T2037 | Z0001 | Z0002 | G0071 | G0072 |
| G0073 | G0074     | G0075 | G0076 | G0077 | G0078 | G0079 | G0080 | G0081 | G0082 | G0175 | G0351 | G0396 | G0397 |
| G0436 | G0437     | G0442 | G0443 | G0463 | G0466 | G0467 | G0469 | G0470 | G0502 | G0503 | G0504 | G0505 | G0506 |
| G0507 | G0511     | G0512 | G0513 | G0514 | G0515 | 0359T | 0360T | 0361T | 0362T | 0363T | 0364T | 0365T | 0366T |
| 0367T | 0368T     | 0369T | 0370T | 0371T | 0372T | 0373T | 0374T | 90791 | 90792 | 90801 | 90802 | 90804 | 90805 |
| 90806 | 90807     | 90808 | 90809 | 90810 | 90811 | 90812 | 90813 | 90814 | 90815 | 90820 | 90831 | 90832 | 90833 |
| 90834 | 90835     | 90836 | 90837 | 90838 | 90839 | 90840 | 90842 | 90843 | 90844 | 90845 | 90846 | 90847 | 90848 |
| 90849 | 90853     | 90855 | 90857 | 90862 | 90865 | 90875 | 90876 | 90880 | 90900 | 90901 | 90902 | 90904 | 90906 |
| 90908 | 90910     | 97003 | 97004 | 99058 | 99201 | 99202 | 99203 | 99204 | 99205 | 99211 | 99212 | 99213 | 99214 |
| 99215 | 99241     | 99242 | 99243 | 99244 | 99245 | 99371 | 99372 | 99373 | 99404 | 99408 | 99409 | 99412 | 99420 |
| 99487 | 99489     | 99490 | 98966 | 98967 | 98968 | G0438 | G0439 | G0468 | G2025 |       |       |       |       |
